# Supplementary material for: Intergenerational Effects of Adversity on Adolescent Self-Efficacy: The Role of Parental Self-Regulation
Source: Research Square preprint supplement (doi:10.21203/rs.3.rs-6814943/v1), 2025-08-22
Supplement: Supplementary file 1 [file ffa1049f322f146e33fd7c65.docx]

**Table 3**

*Bivariate Associations Between Parent Self-regulation, Adolescent Self-efficacy, Parental Adversity, and Demographic Characteristics*

|  |  | 1 | 2 | 3 | 4 | 5 | 6 | 7 | 8 | 9 | 10 | 11 | 12 | 13 |
| --- | --- | --- | --- | --- | --- | --- | --- | --- | --- | --- | --- | --- | --- | --- |
| 1 | *Parent personal agency* | - |  |  |  |  |  |  |  |  |  |  |  |  |
| 2 | *Parent self-efficacy* | .26** | - |  |  |  |  |  |  |  |  |  |  |  |
| 3 | *Adolescent self-efficacy* | .10** | .15** | - |  |  |  |  |  |  |  |  |  |  |
| 4 | Parental ACEs | 2.75 | 26.54*** | 14.94** | - |  |  |  |  |  |  |  |  |  |
| 5 | Area remoteness | .02 | .85 | 1.01 | 15.56** | - |  |  |  |  |  |  |  |  |
| 6 | Household language | 1.16 | .38 | .02 | 26.21*** | 38.18*** | - |  |  |  |  |  |  |  |
| 7 | Area SES | .05 | .63 | 1.37 | 18.74*** | 315.36*** | .23 | - |  |  |  |  |  |  |
| 8 | Parent gender | .70 | .18 | .86 | 3.69 | .42 | 3.59 | .414 | - |  |  |  |  |  |
| 9 | *Parent age* | -.03 | .01 | -.02 | 8.05 | 42.03*** | .63 | 31.942*** | 47.37*** | - |  |  |  |  |
| 10 | Adolescent gender | .93 | 3.08 | 9.28** | 5.03 | .49 | .90 | .428 | 1.87 | .71 | - |  |  |  |
| 11 | Adolescent age | .34 | 1.39 | .67 | 5.16 | 3.06 | 3.05 | .899 | 1.71 | 1.22 | .57 | - |  |  |
| 12 | Parent education | 33.92*** | 4.05 | 10.40** | 10.58 | 7.39* | 5.51 | 17.676*** | 7.09* | 19.06*** | 1.12 | 2.24 | - |  |
| 13 | Parent employment | 2.43 | .09 | 4.97* | 4.32 | .02 | 4.91* | 6.586** | .19 | .35 | 9.88** | .39 | 31.83*** | - |

Note. Continuous variables are italicised. All other variables were treated as categorical. Spearman’s rho was used for associations between continuous variables, Kruskal Wallis H Tests for between continuous and categorical variables, and *χ*2 for between categorical variables.

**p <* .05; ***p <* .01; ****p <* .001.
